# Supplementary material for: Comparative Effects of Proximal and Distal Small Intestinal Glucose Exposure on Glycemia, Incretin Hormone Secretion, and the Incretin Effect in Health and Type 2 Diabetes
Source: Oxford University Press journal article supplement (doi:10.2337/dc18-2156), 2019-02-14
Supplement: dc182156supplementarydata.pdf [file dc182156supplementarydata.pdf]

## SUPPLEMENTARY DATA

**Supplementary Figure S1.** Outline of study protocol. Subjects were studied on four days. On two study days, a catheter was positioned (infusion ports opening 13cm and 190cm beyond the pylorus) for infusion of 30g glucose, mixed with 3g 3-O-methylglucose (3-OMG, a marker of glucose absorption), into either the proximal or distal site and 0.9% saline into the alternate site over 60min. An intravenous isoglycemic clamp was performed on the other two days. Blood glucose, serum 3-OMG and plasma hormones were evaluated at intervals over 180min.

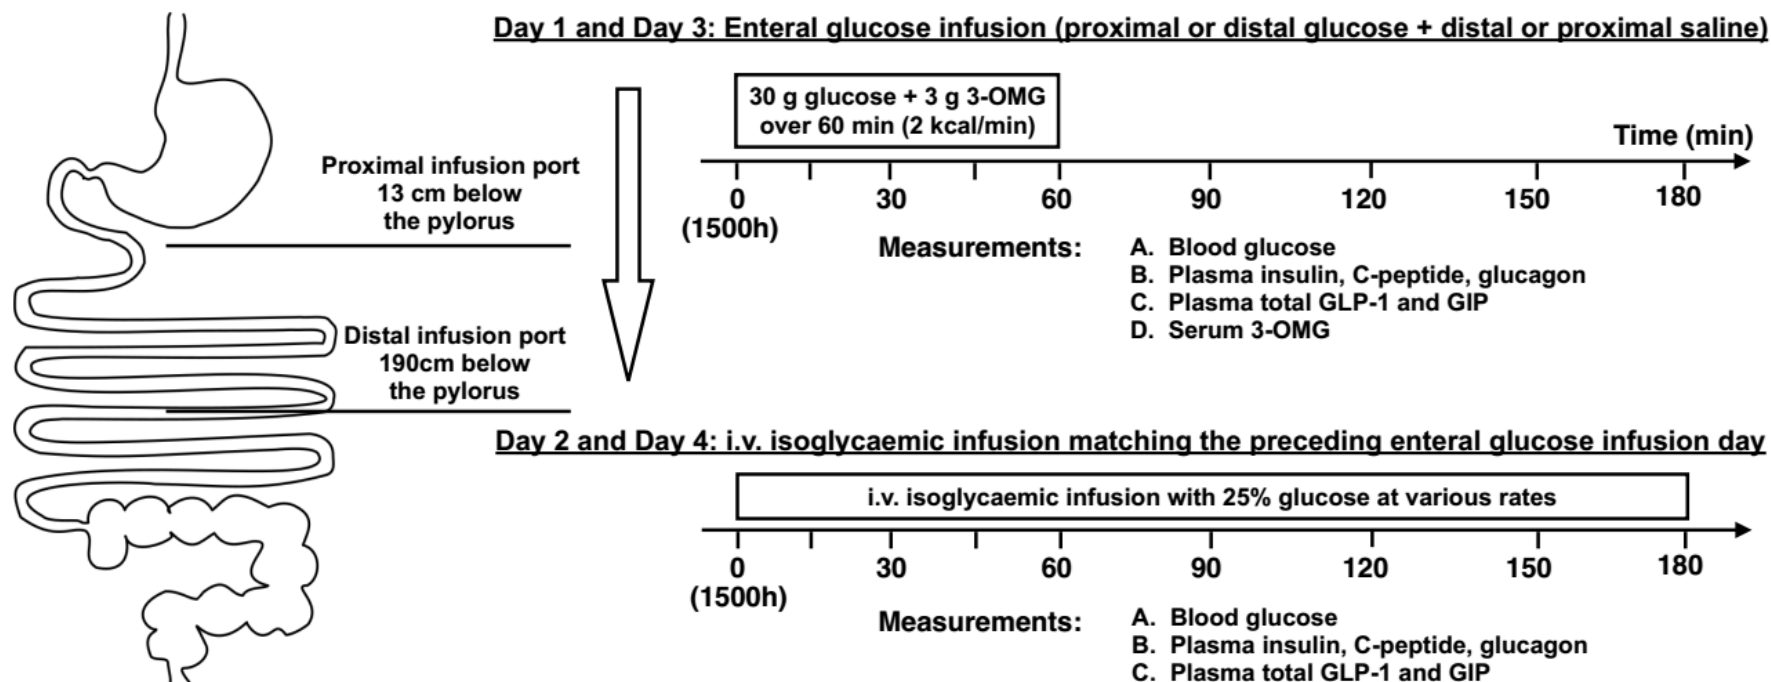

# SUPPLEMENTARY DATA

**Supplementary Table S1.** Subject demographics

|                                    | Healthy subjects (n = 10) | T2DM subjects (n = 10) | P value |
|------------------------------------|---------------------------|------------------------|---------|
| Age (years)                        | 45.2 ± 7.8                | 67.3 ± 2.4             | 0.021   |
| Gender                             | 10 males                  | 8 males + 2 females    | -       |
| Ethnicity                          | 9 Caucasians + 1 Asian    | 10 Caucasians          | -       |
| Weight (kg)                        | 79.9 ± 4.3                | 90.0 ± 5.1             | 0.372   |
| BMI (kg/m <sup>2</sup> )           | 25.3 ± 1.3                | 28.5 ± 1.1             | 0.072   |
| HbA1c (%)                          | 5.2 ± 0.1                 | 6.2 ± 0.2              | < 0.001 |
| HbA1c (mmol/mol)                   | 33.6 ± 1.2                | 43.9 ± 1.7             | < 0.001 |
| Duration of known diabetes (years) | -                         | 9.3 ± 1.9              | -       |
| Use of metformin                   | -                         | n = 4 subjects         | -       |

Data are means ± SEM. Unpaired Student's *t*-test was used to determine statistical difference.
